# Supplementary material
Source: publisher figshare collection journal article supplement (https://karger.figshare.com/articles/dataset/_/26392582)
Supplement: Supplementary file 1 [file 1]

Supplementary Figure 1: Galbraith plot for study assessing the effect of pre-conception folic acid and multivitamin for the prevention of NTD

Supplementary Figure 2: Funnel plot for study assessing the effect of pre-conception folic acid and multivitamin for the prevention of NTD


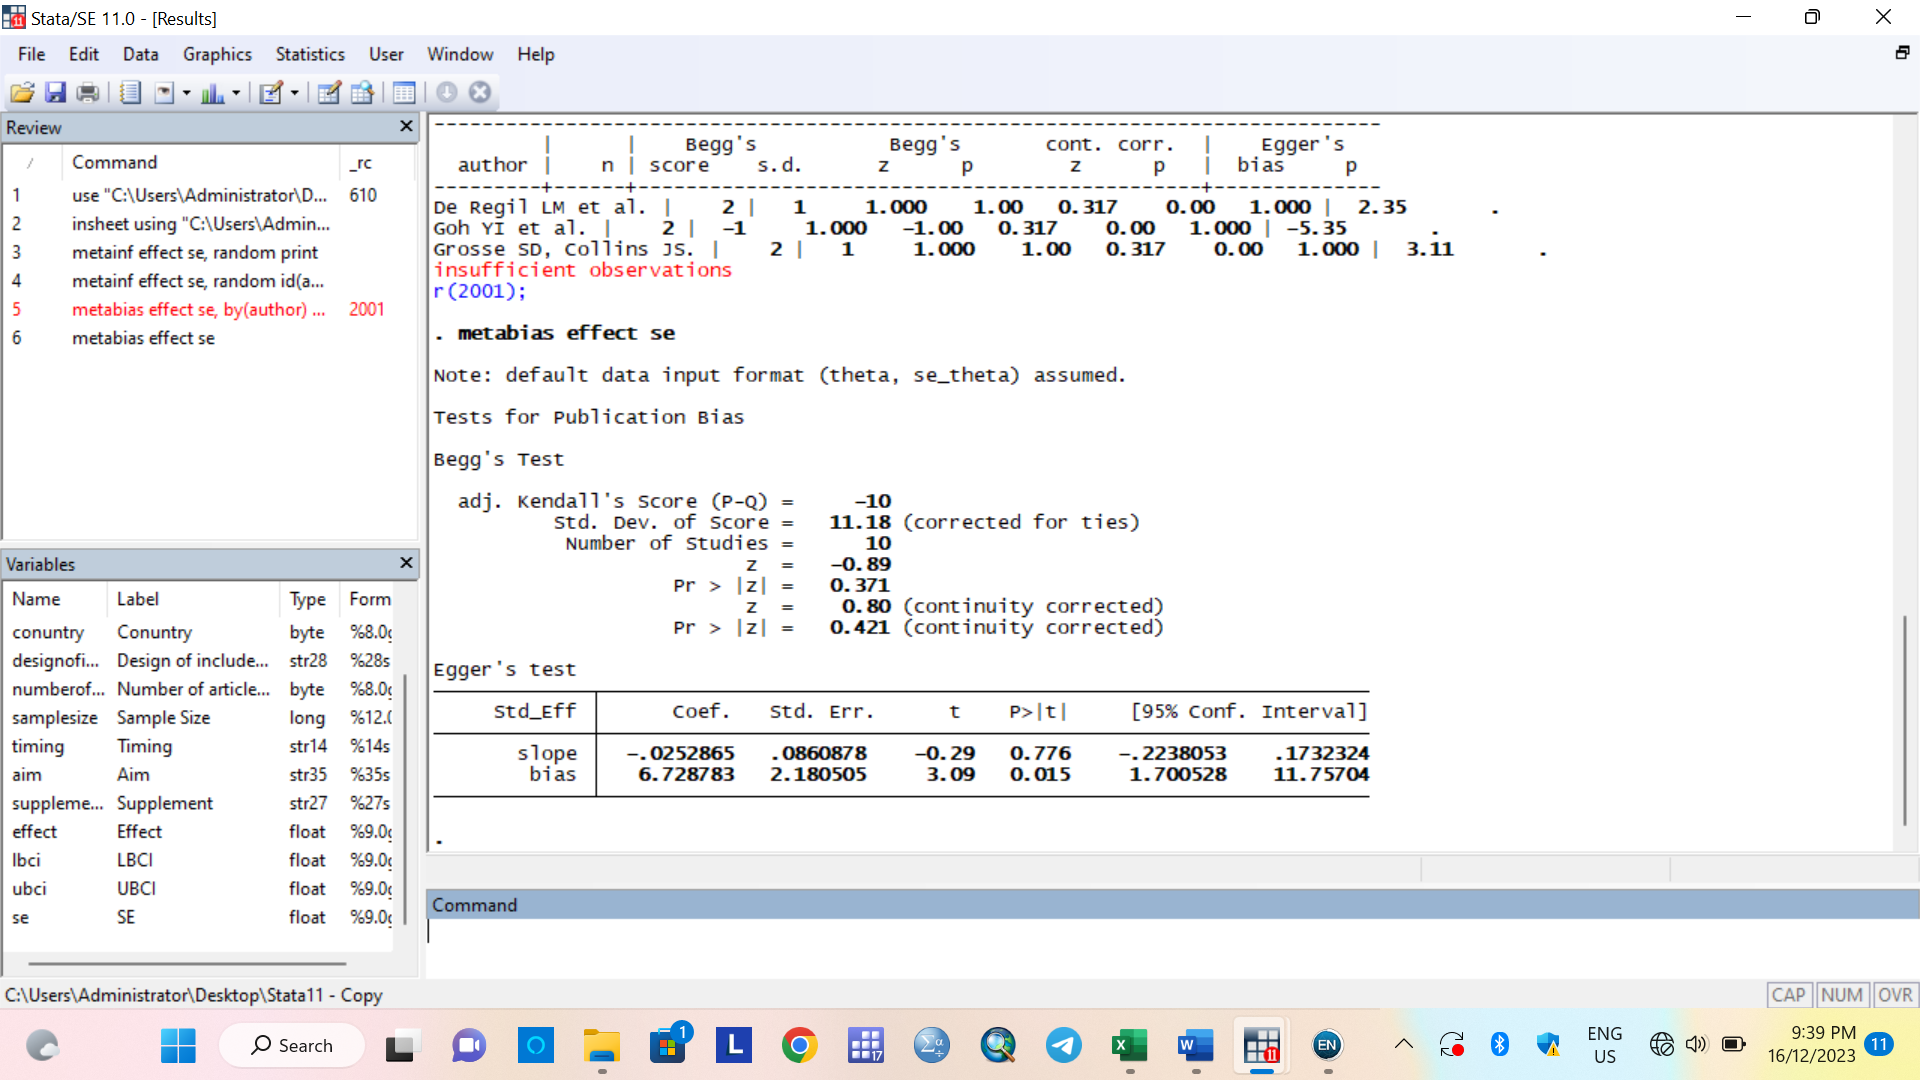


Supplementary Figure 3: Egger publication bias test for study assessing the effect of pre-conception folic acid and multivitamin for the prevention of NTD


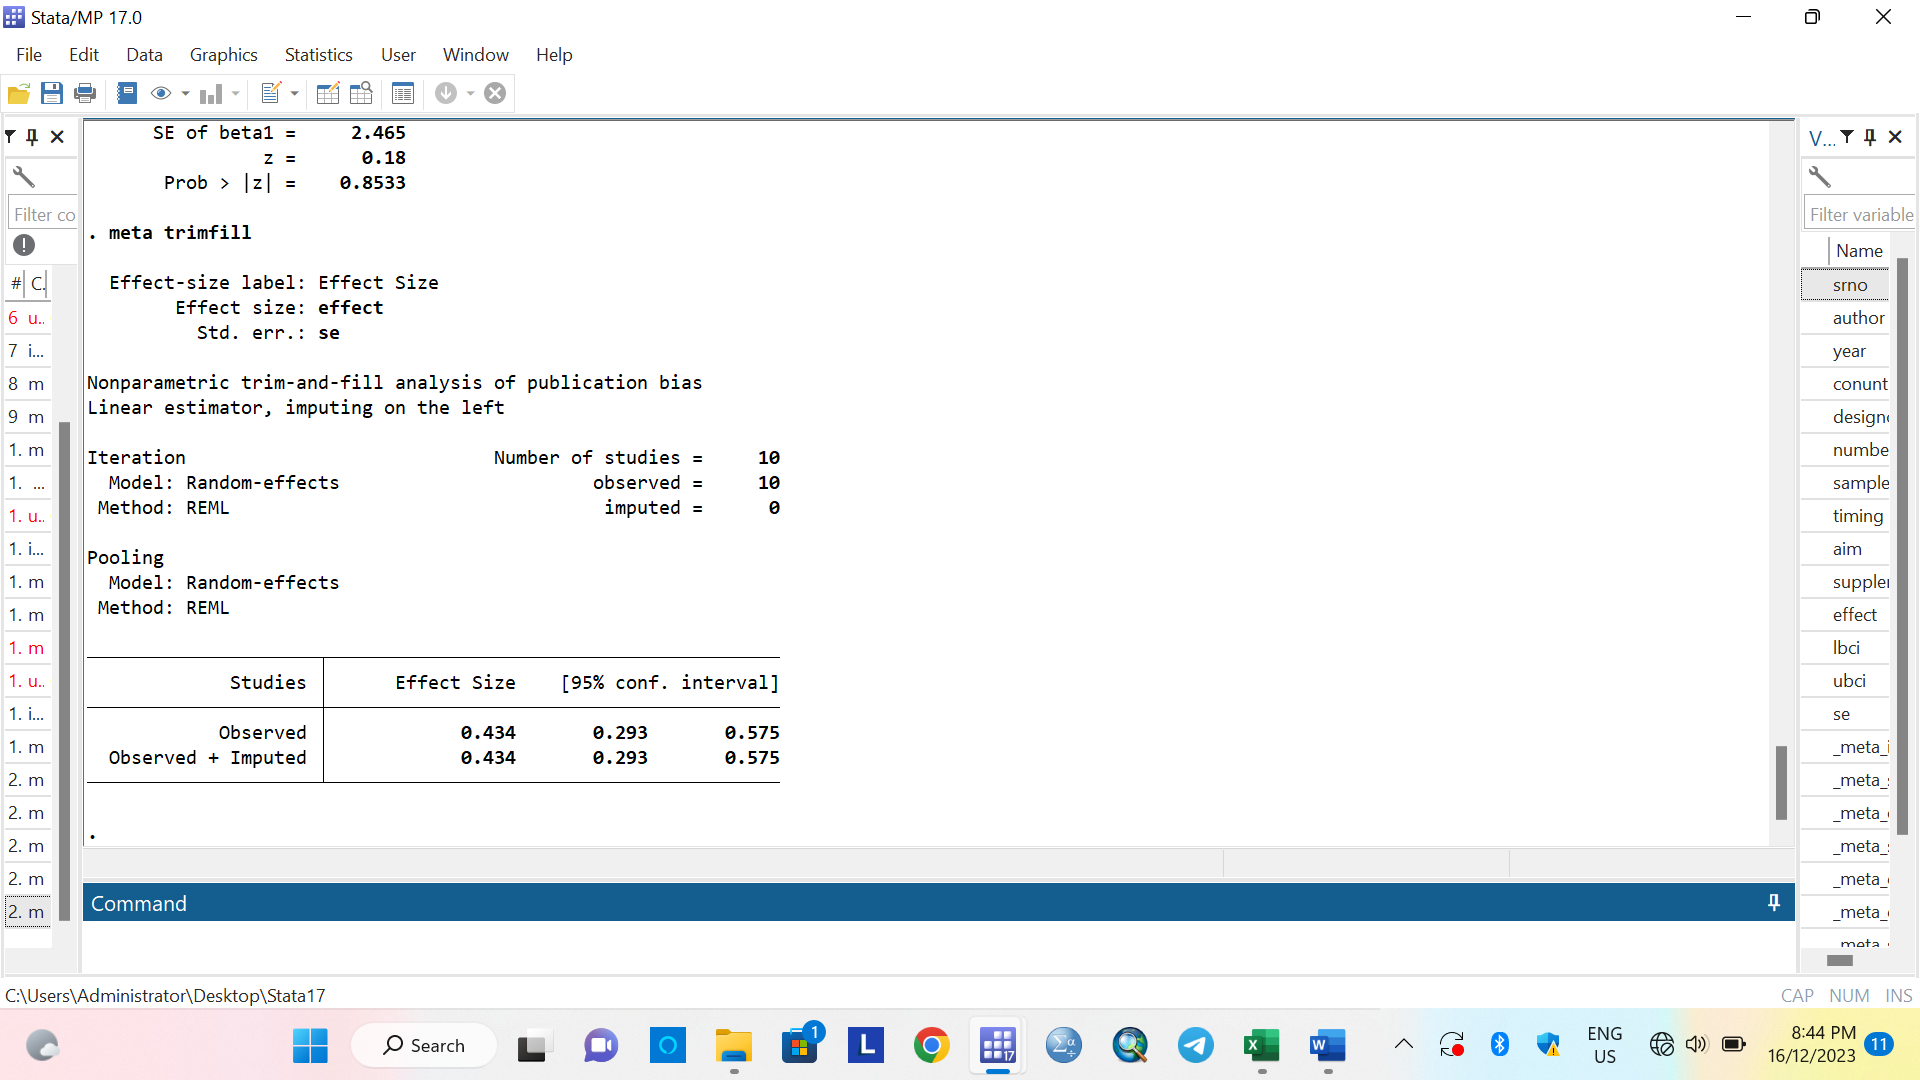


Supplementary Figure 4: Trim and fill analysis test for study assessing the effect of pre-conception folic acid and multivitamin for the prevention of NTD


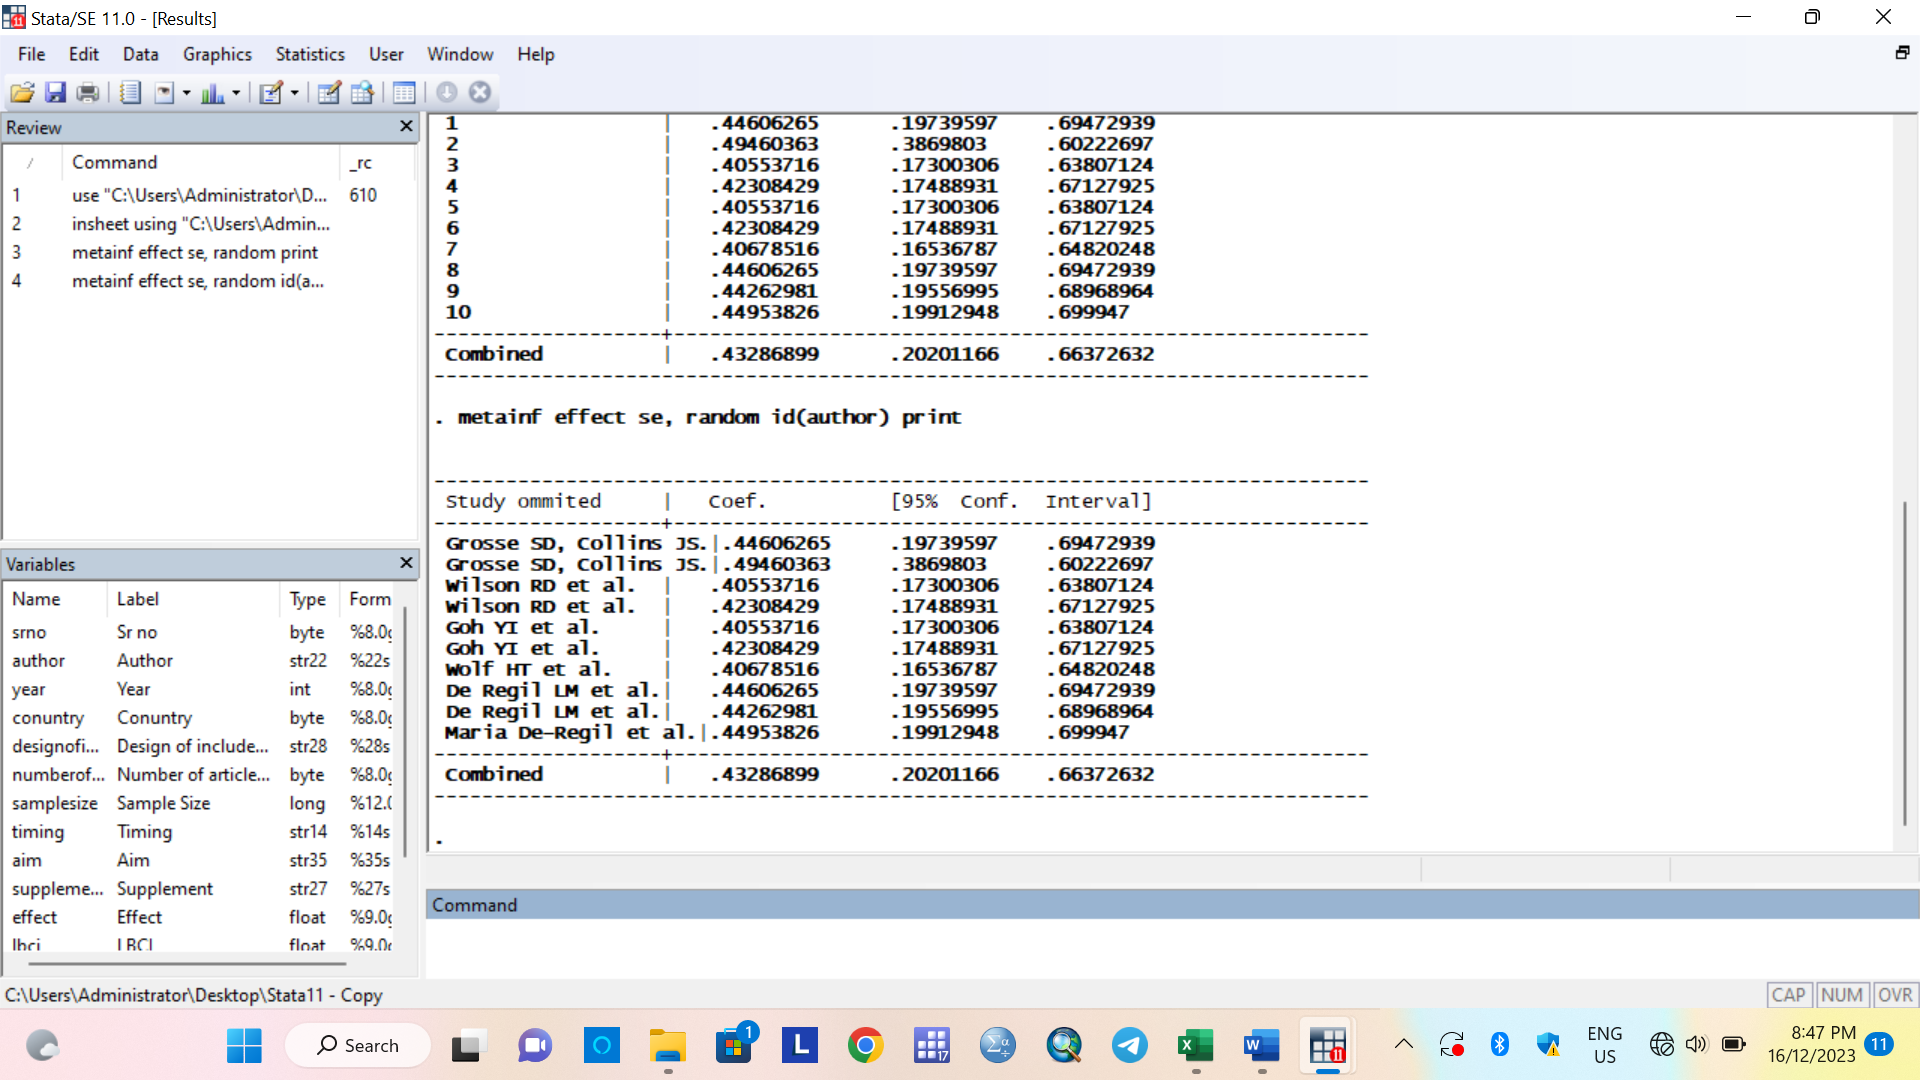


Supplementary Figure 5: sensitivity analysis test for study assessing the effect of pre-conception folic acid and multivitamin for the prevention of NTD
